# Supplementary material
Source: PubMed Central journal article supplement (PMC3553796)
Supplement: IAI.00930-12_zii999099984so1.pdf [file IAI.00930-12_zii999099984so1.pdf]

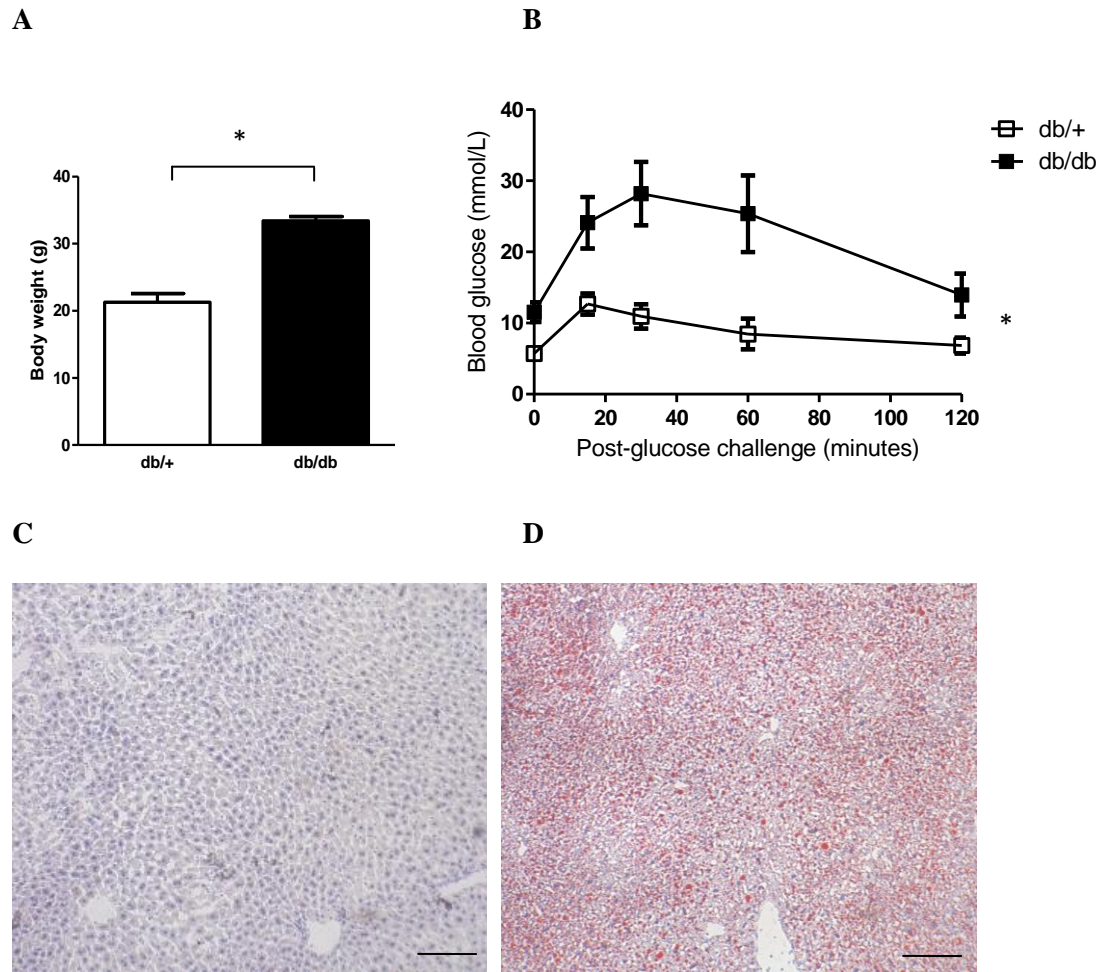

**FIG S1** Weight and insulin resistance in leptin receptor-deficient

*C57BL/6J-Dock7<sup>m</sup> Lep<sup>r</sup><sup>db/+</sup> + mice. Homozygous *db/db* mice were obese (A) and insulin resistant (B) compared to heterozygous *db/+* mice. This was associated with ectopic fat deposition in hepatocytes in *db/db* mice (D) as indicated by Oil red O staining, compared to *db/+* mice (C). Magnification = 100×; scale = 100 μm. \*P<0.05.*
