# Supplementary material
Source: PubMed Central journal article supplement (PMC3553796)
Supplement: IAI.00930-12_zii999099984so2.pdf [file IAI.00930-12_zii999099984so2.pdf]

**TABLE S1** Oligonucleotide primer sequences for RT-PCR

| <b>Gene</b>    |           | <b>Sequence (5'-3')</b> |
|----------------|-----------|-------------------------|
| IL-1 $\beta$   | Sense     | CAACCAACAAGTGATATTCTCC  |
|                | Antisense | CATCTTCTTCTTTGGGTATTGC  |
| TNF- $\alpha$  | Sense     | CTTCTCATTCTGCTTGTGG     |
|                | Antisense | GAAGATGATCTGAGTGTGAGG   |
| IL-6           | Sense     | TCAATTCCAGAAACCGCTATG   |
|                | Antisense | TGGTTGTCACCAGCATCAGT    |
| IL-12          | Sense     | ACATCAAGAGCAGTAGCAGTTC  |
|                | Antisense | GGTCTCCTCGGCAGTTGG      |
| IFN- $\gamma$  | Sense     | CACAGGTCCAGCGCCAAGCA    |
|                | Antisense | CCCACCCCGAATCAGCAGCG    |
| iNOS           | Sense     | ACGCTTCACTTCCAATGCAAC   |
|                | Antisense | AGCCTCATGGTAAACACGTTT   |
| PPIB           | Sense     | GGAGATGAATCTGTAGGACGAG  |
|                | Antisense | ATAGATGCTCTTTCCTCCTGTG  |
| Actin- $\beta$ | Sense     | CCTTCTTGGGTATGGAATCCT   |
|                | Antisense | TTGATCTTCATGGTGCTAGGAG  |

PPIB; peptidylprolyl isomerase B (cyclophilin B)
